# Supplementary material for: Associations Between Alexithymia, Cognitive Emotion Regulation, and Physical Symptoms in Coronary Heart Disease
Source: Research Square preprint supplement (doi:10.21203/rs.3.rs-8530045/v1), 2026-01-27
Supplement: Supplementary file 1 [file 5ee060680b7a6690c98a62c1.docx]

**Associations Between Alexithymia, Cognitive Emotion Regulation, and Physical Symptoms in Coronary Heart Disease**

Supplementary Table 1. CERS Subscales and PSI by Alexithymia Group

Supplementary Table 2. Overview of measurement instruments used in the study

Supplementary Table 3. Model fit and multicollinearity diagnostics of hierarchical regression models predicting physical symptom index (PSI)

Supplementary Table 4. Spearman Correlation Matrix for Study Variables in CHD Patients

Supplementary Table 5. Partial Spearman Correlations Controlling for Age & NYHA Grade

Supplementary Table 1. CERS Subscales and PSI by Alexithymia Group

| Variable | Overall (n=199) | Alexithymic (n=62) | Borderline (n=57) | Non-alexithymic (n=80) | F / χ² (p) | η² |
| --- | --- | --- | --- | --- | --- | --- |
| **Maladaptive CERS** | 59.75 ± 8.37 | 52.69 ± 5.31 | 48.98 ± 6.63 | 41.53 ± 7.84 | 30.08** (P<0.01) | 0.23 |
| – Self-blame | 14.32 ± 3.39 | 15.81 ± 2.88 | 14.58 ± 3.62 | 12.99 ± 3.10 | 30.08** (P<0.01) | 0.23 |
| – Rumination | 11.25 ± 2.61 | 12.47 ± 2.28 | 11.53 ± 2.26 | 10.10 ± 2.63 | 30.08** (P<0.01) | 0.23 |
| – Catastrophising | 10.80 ± 3.07 | 12.77 ± 2.62 | 11.23 ± 2.63 | 8.98 ± 2.62 | 30.08** (P<0.01) | 0.23 |
| – Other-blame | 10.79 ± 2.73 | 11.65 ± 2.41 | 11.56 ± 2.71 | 9.58 ± 2.53 | 30.08** (P<0.01) | 0.23 |
| **Adaptive CERS** | 33.81 ± 7.53 | 43.61 ± 6.48 | 45.64 ± 8.06 | 48.89 ± 6.58 | 3.46* (P<0.05) | 0.03 |
| – Positive refocusing | 8.02 ± 2.86 | 7.50 ± 2.72 | 8.09 ± 2.84 | 8.36 ± 2.94 | 3.46* (P<0.05) | 0.03 |
| – Refocusing on planning | 7.61 ± 2.96 | 5.82 ± 1.91 | 6.86 ± 2.77 | 9.54 ± 2.65 | 3.46* (P<0.05) | 0.03 |
| – Positive reappraisal | 7.86 ± 3.13 | 6.08 ± 2.00 | 7.37 ± 2.74 | 9.59 ± 3.23 | 3.46* (P<0.05) | 0.03 |
| – Putting into perspective | 10.46 ± 3.34 | 11.94 ± 3.33 | 10.30 ± 3.42 | 9.43 ± 2.88 | 3.46* (P<0.05) | 0.03 |
| – Acceptance | 10.70 ± 2.90 | 12.27 ± 2.42 | 13.04 ± 2.66 | 12.70 ± 2.70 | 3.46* (P<0.05) | 0.03 |
| **PSI** | 29.49 ± 5.96 | 32.80 ± 4.38 | 32.01 ± 4.78 | 25.13 ± 5.05 | 31.63** (P<0.01) | 0.24 |
| **NYHA functional class** | 1.71 ± 0.62 | 1.93 ± 0.69 | 1.68 ± 0.60 | 1.61 ± 0.60 | 5.09* (P=0.024) | — |

Notes: Values are presented as mean ± standard deviation.

Maladaptive CERS includes Self-blame, Rumination, Catastrophising, and Other-blame;

Adaptive CERS includes Positive refocusing, Refocusing on planning, Positive reappraisal, Putting into perspective, and Acceptance.

PSI = Physical Symptom Index; NYHA = New York Heart Association functional class; CERS = Cognitive Emotion Regulation Strategies. Alexithymic group: TAS-20 total score ≥ 61; Borderline alexithymia: TAS-20 score 52–60; Non-alexithymic group: TAS-20 ≤ 51.

Statistical comparisons across the three groups were performed using one-way ANOVA for continuous variables and χ² test for categorical variables. • Effect sizes are presented as η² for ANOVA. Significance levels: **p* < 0.05, ***p* < 0.01

Supplementary Table 2. Overview of measurement instruments used in the study

| Instrument | Construct | Items | Subscales | Score interpretation |
| --- | --- | --- | --- | --- |
| PSI | Physical symptoms | 12 |  | Higher scores indicate greater symptom burden |
| TAS-20 | Alexithymia | 20 | DIF, DDF, EOT | Higher scores indicate greater alexithymia |
| CERQ | Emotion regulation | 36 | Adaptive / Non-adaptive | Higher scores indicate greater strategy use |

Supplementary Table 3. Model fit and multicollinearity diagnostics of hierarchical regression models predicting physical symptom index (PSI)

| Model | R² | Adjusted R² | Max VIF | Max Condition Index |
| --- | --- | --- | --- | --- |
| Model 1 | 0.006 | 0.000 | 1.02 | 9.11 |
| Model 2 | 0.172 | 0.163 | 1.35 | 18.71 |
| Model 3 | 0.269 | 0.257 | 1.72 | 21.63 |
| Model 4 | 0.283 | 0.268 | 1.94 | 24.15 |
| Model 5 | 0.341 | 0.324 | 2.18 | 26.58 |

Note; Model predictors:

1 = (Constant), adaptive CERS (aCERS);

2 = (Constant), aCERS, non-adaptive CERS (naCERS);

3 = (Constant), aCERS, naCERS, difficulty identifying feelings (DIF);

4 = (Constant), aCERS, naCERS, DIF, difficulty describing feelings (DDF);

5 = (Constant), aCERS, naCERS, DIF, DDF, externally oriented thinking (EOT). PSI = Physical Symptom Index.

Multicollinearity was assessed using variance inflation factors (VIF) and condition indices. All models showed acceptable multicollinearity (maximum condition index < 30 and all VIFs < 5).

Supplementary Table 4. Spearman Correlation Matrix for Study Variables in CHD Patients

| Variable | Age | Education | Illness Duration | NYHA Grade | Adaptive CERS (aCERS) | Non-adaptive CERS (naCERS) | DIF | DDF | EOT | Physical Symptoms (PSI) |
| --- | --- | --- | --- | --- | --- | --- | --- | --- | --- | --- |
| **Age** | 1.000 | -0.095 | 0.149* | 0.110 | -0.202** | 0.284** | 0.401** | 0.441** | 0.389** | 0.366** |
| **Significance (2-tailed)** | — | 0.180 | 0.036 | 0.123 | 0.004 | 0.000 | 0.000 | 0.000 | 0.000 | 0.000 |
| **Education** | -0.095 | 1.000 | 0.031 | -0.015 | 0.118 | -0.099 | -0.045 | 0.025 | -0.050 | -0.092 |
| **Significance (2-tailed)** | 0.180 | — | 0.663 | 0.831 | 0.096 | 0.165 | 0.527 | 0.721 | 0.481 | 0.197 |
| **Illness Duration** | 0.149* | 0.031 | 1.000 | -0.025 | -0.111 | 0.102 | -0.021 | 0.139 | 0.164* | 0.040 |
| **Significance (2-tailed)** | 0.036 | 0.663 | — | 0.725 | 0.117 | 0.153 | 0.770 | 0.050 | 0.021 | 0.576 |
| **NYHA Grade** | 0.110 | -0.015 | -0.025 | 1.000 | 0.014 | 0.183** | 0.238** | 0.200** | 0.038 | 0.140* |
| **Significance (2-tailed)** | 0.123 | 0.831 | 0.725 | — | 0.848 | 0.010 | 0.001 | 0.005 | 0.597 | 0.049 |
| **Adaptive CERS (aCERS)** | -0.202** | 0.118 | -0.111 | 0.014 | 1.000 | -0.042 | -0.125 | -0.193** | -0.255** | -0.090 |
| **Significance (2-tailed)** | 0.004 | 0.096 | 0.117 | 0.848 | — | 0.554 | 0.078 | 0.006 | 0.000 | 0.207 |
| **Non-adaptive CERS (naCERS)** | 0.284** | -0.099 | 0.102 | 0.183** | -0.042 | 1.000 | 0.444** | 0.447** | 0.397** | 0.402** |
| **Significance (2-tailed)** | 0.000 | 0.165 | 0.153 | 0.010 | 0.554 | — | 0.000 | 0.000 | 0.000 | 0.000 |
| **Difficulties Identifying Feelings (DIF)** | 0.401** | -0.045 | -0.021 | 0.238** | -0.125 | 0.444** | 1.000 | 0.579** | 0.253** | 0.478** |
| **Significance (2-tailed)** | 0.000 | 0.527 | 0.770 | 0.001 | 0.078 | 0.000 | — | 0.000 | 0.000 | 0.000 |
| **Difficulties Describing Feelings (DDF)** | 0.441** | 0.025 | 0.139 | 0.200** | -0.193** | 0.447** | 0.579** | 1.000 | 0.299** | 0.438** |
| **Significance (2-tailed)** | 0.000 | 0.721 | 0.050 | 0.005 | 0.006 | 0.000 | 0.000 | — | 0.000 | 0.000 |
| **Externally Oriented Thinking (EOT)** | 0.389** | -0.050 | 0.164* | 0.038 | -0.255** | 0.397** | 0.253** | 0.299** | 1.000 | 0.412** |
| **Significance (2-tailed)** | 0.000 | 0.481 | 0.021 | 0.597 | 0.000 | 0.000 | 0.000 | 0.000 | — | 0.000 |
| **Physical Symptoms Index (PSI)** | 0.366** | -0.092 | 0.040 | 0.140* | -0.090 | 0.402** | 0.478** | 0.438** | 0.412** | 1.000 |
| **Significance (2-tailed)** | 0.000 | 0.197 | 0.576 | 0.049 | 0.207 | 0.000 | 0.000 | 0.000 | 0.000 | — |

Supplementary Table 5. Partial Spearman Correlations Controlling for Age & NYHA Grade

| Variable | aCERS | naCERS | DIF | DDF | EOT | PSI |
| --- | --- | --- | --- | --- | --- | --- |
| **aCERS** | 1.000 | 0.041 (p = 0.571) | -0.038 (p = 0.596) | -0.111 (p = 0.121) | -0.199 (p = 0.005) | -0.009 (p = 0.898) |
| **naCERS** | 0.041 (p = 0.571) | 1.000 | 0.334 (p < 0.001) | 0.333 (p < 0.001) | 0.315 (p < 0.001) | 0.316 (p < 0.001) |
| **DIF** | -0.038 (p = 0.596) | 0.334 (p < 0.001) | 1.000 | 0.520 (p < 0.001) | 0.086 (p = 0.227) | 0.343 (p < 0.001) |
| **DDF** | -0.111 (p = 0.121) | 0.333 (p < 0.001) | 0.520 (p < 0.001) | 1.000 | 0.089 (p = 0.213) | 0.293 (p < 0.001) |
| **EOT** | -0.199 (p = 0.005) | 0.315 (p < 0.001) | 0.086 (p = 0.227) | 0.089 (p = 0.213) | 1.000 | 0.298 (p < 0.001) |
| **PSI** | -0.009 (p = 0.898) | 0.316 (p < 0.001) | 0.343 (p < 0.001) | 0.293 (p < 0.001) | 0.298 (p < 0.001) | 1.000 |
